# Supplementary material for: Amelioration of CCl4-induced oxidative stress and hepatotoxicity by Ganoderma lucidum in Long Evans rats
Source: PubMed Central journal article supplement (PMC10279652; doi:10.1038/s41598-023-35228-y), 2023-06-19
Supplement: 41598_2023_35228_MOESM1_ESM.pdf [file 41598_2023_35228_MOESM1_ESM.pdf]

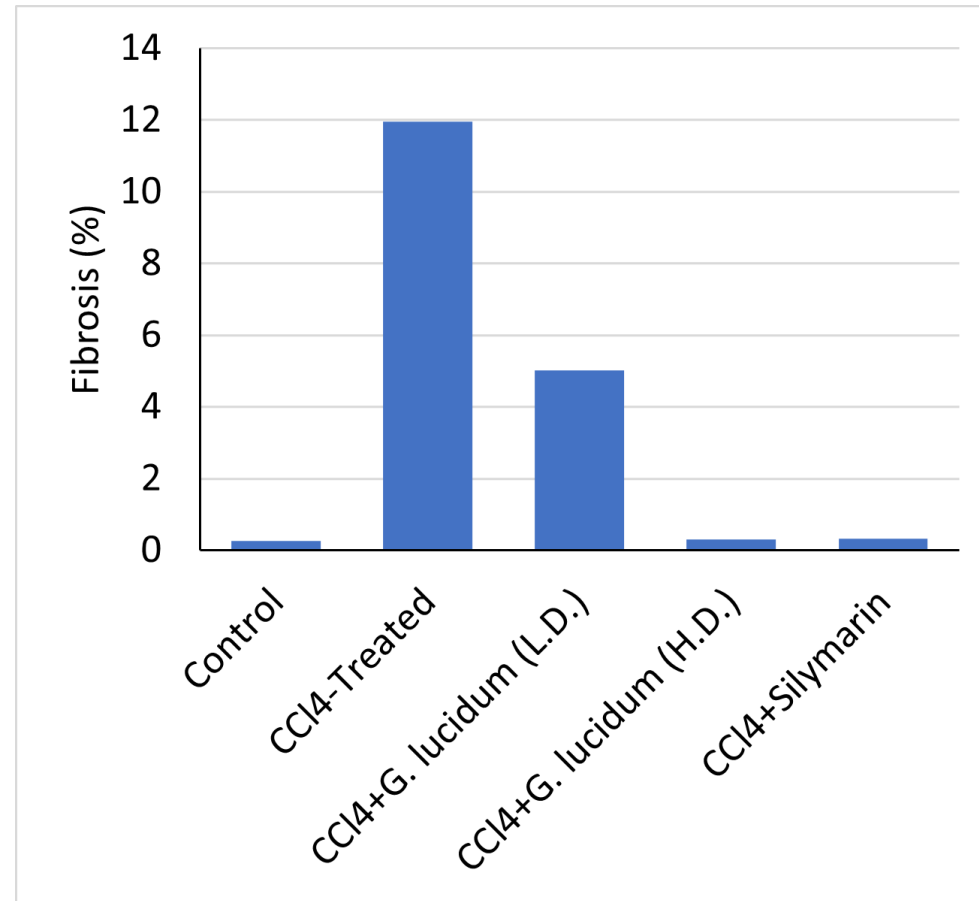

Fig. S1. Quantification of hepatic fibrosis

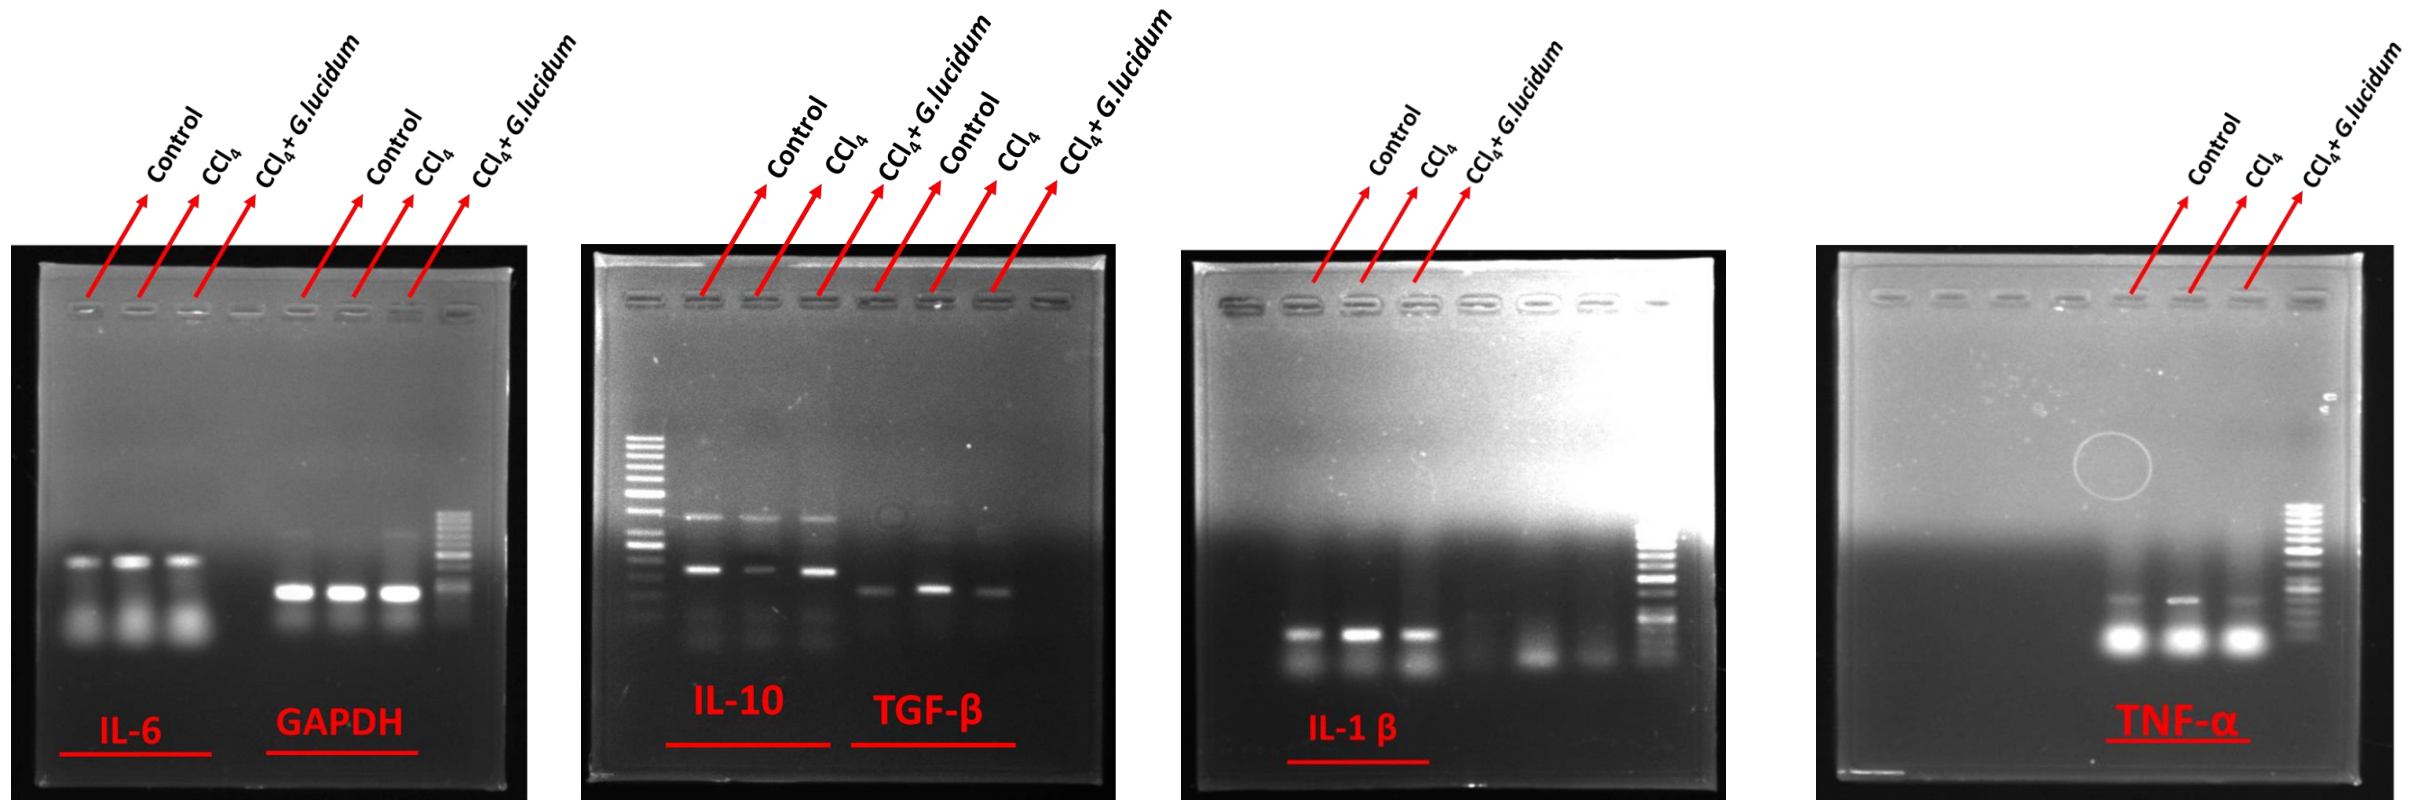

Fig. S2. Full length gels for gene expression analysis

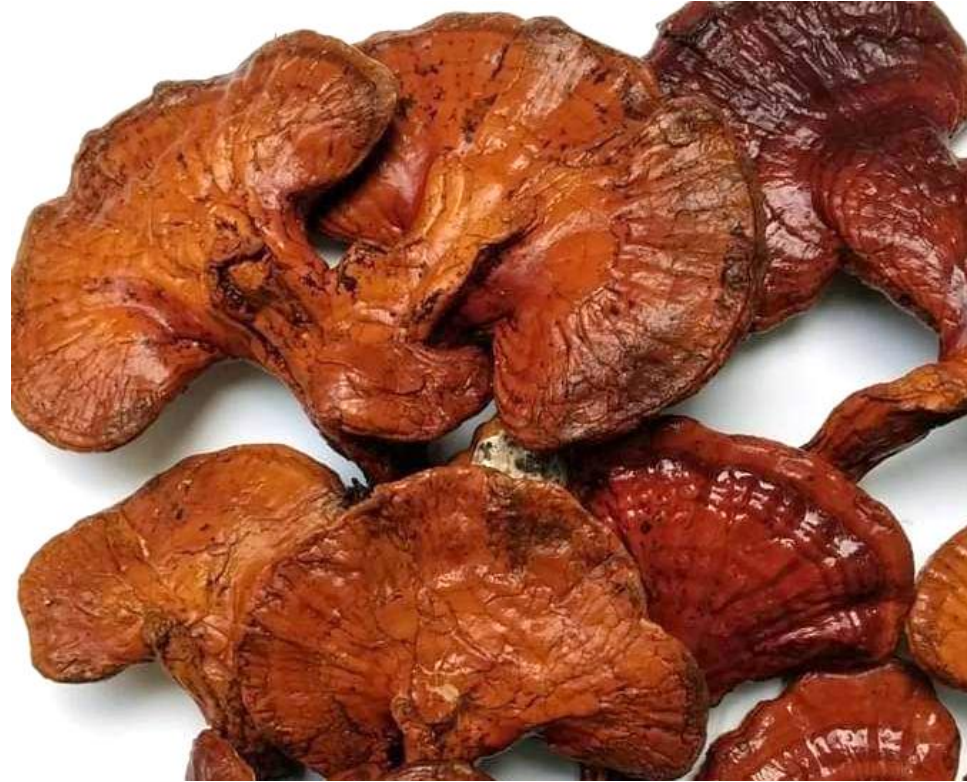

Fig. S3. Photograph of whole *G. lucidum*

| Target Gene   | Primer Sequence (5'–3')                                      | Annealing Temperature    |
|---------------|--------------------------------------------------------------|--------------------------|
| <b>GAPDH</b>  | F-5'-CTTGCCGTGGGTAGAGTCAT-3'<br>R-5'-AGACAGCCGCATCTTCTTGT-3' | F- 60.5 °C<br>R- 58.4 °C |
| <b>IL-1-β</b> | F-5'-AGACCTGACTTGGCAGAGA 3'<br>R-5'-GCAATGGTCGGGACATAGTT3'   | F- 57.3 °C<br>R- 58.4 °C |
| <b>IL-6</b>   | F-5'-CCCACCAGGAACGAAAGTCA3'<br>R-5'-GGCAACTGGCTGGAAGTCTC3'   | F- 60.5 °C<br>R- 63.3 °C |
| <b>IL-10</b>  | F-5'-ATCATGGAAGGAGCAACCTG3'<br>R-5'-GGGAAGCAACTGAACTTCG3'    | F- 58.4 °C<br>R- 58.4 °C |
| <b>TNF-α</b>  | F-5'-TGTGGGTGAGGAGCACATAG-3'<br>R-5'-GTCGTAGCAAACCAAGC-3'    | F- 60.5 °C<br>R- 60.5 °C |
| <b>TGF-β</b>  | F-5'-AATTCCTGGCGTTACCT3'<br>R-5'-CCTGTATTCCGTCTCCTT3'        | F- 50 °C<br>R- 53.9 °C   |

Table S1: The sequences of the primers used in the quantitative polymerase chain reaction (qPCR) assay
